# Supplementary material for: Modification and Characterization of Fe3O4 Nanoparticles for Use in Adsorption of Alkaloids
Source: MDPI journal article supplement (doi:10.3390/molecules23030562), 2018-03-02
Supplement: s1 [file s1]

## Supporting Information

# Modification and Characterization of Fe<sub>3</sub>O<sub>4</sub> Nanoparticles for Use in Adsorption of Alkaloids

Linyan Yang <sup>1,2</sup>, Jing Tian <sup>1</sup>, Jiali Meng <sup>1</sup>, Ruili Zhao <sup>1</sup>, Cun Li <sup>1,\*</sup>, Jifei Ma <sup>1,\*</sup>, Tianming Jin <sup>1,\*</sup>

<sup>1</sup>College of Animal Science and Veterinary Medicine, Tianjin Agricultural University, Tianjin, 300384, China

<sup>2</sup>Guangxi Key Laboratory for the Chemistry and Molecular Engineering of Medicinal Resources, Chemical and pharmaceutical college of Guangxi Normal University, Guilin 541004, China

**Table S1** Retention time and peak area of alkaloids when HPLC conditions were adjusted as follows: pH range was from 5 to 9; adsorption time was 6min.

| Conditions | Retention file | Retention time | Peak area |
|------------|----------------|----------------|-----------|
| pH5, 6min  | 170623000023.D | 8.418min       | 97.7      |
|            |                | 9.451min       | 83.1      |
| pH6, 6min  | 170623000024.D | 8.417min       | 97.5      |
|            |                | 9.476min       | 80.3      |
| pH7, 6min  | 170623000014.D | 7.899min       | 88.8      |
|            |                | 8.87min        | 76.6      |
| pH8, 6min  | 170623000022.D | 8.968min       | 77.2      |
|            |                | 9.994min       | 58.1      |
| pH9, 6min  | 170623000017.D | 8.086min       | 84.9      |
|            |                | 9.101min       | 70.0      |

**Table S2** Retention time and peak area of alkaloids when HPLC conditions were adjusted as follows: adsorption time was from 2min to 10min, while pH7 was used.

| Conditions | Retention file | Retention time | Peak area |
|------------|----------------|----------------|-----------|
| pH7, 2min  | 170623000012.D | 8.12min        | 90.8      |
|            |                | 9.07min        | 74.3      |
| pH7, 4min  | 170623000013.D | 7.975min       | 93.1      |
|            |                | 8.935min       | 78.6      |
| pH7, 6min  | 170623000014.D | 7.899min       | 88.8      |
|            |                | 8.87min        | 76.6      |
| pH7, 8min  | 170623000018.D | 8.229min       | 89.7      |
|            |                | 9.263min       | 71.4      |
| pH7, 10min | 170623000015.D | 7.994min       | 87.8      |
|            |                | 8.986min       | 74.9      |

\*Correspondence Author. Fax: +86-22-23781297. Tel: 13920589691, 13920081772, 13114881898.

E-mail address: hhlicun@163.com, hbmjfts@126.com, JTMSCI@163.com.
